# Supplementary material
Source: PubMed Central journal article supplement (PMC4129478)
Supplement: mmc1.pdf [file mmc1.pdf]

# Supporting Material

## Analysis of the strength of interfacial hydrogen bonds between tubulin dimers using quantum theory of atoms in molecules

Ahmed T. Ayoub,<sup>1</sup> Travis J. A. Craddock,<sup>2</sup> Mariusz Klobukowski,<sup>1</sup> and Jack Tuszynski<sup>3</sup>

<sup>1</sup> Department of Chemistry and <sup>3</sup> Department of Physics, University of Alberta, Edmonton AB, Canada; <sup>2</sup> Graduate School of Computer and Information Sciences and Center for Psychological Studies, Nova Southeastern University, Ft. Lauderdale, Florida

Figure S1: RMSD equilibration of the backbone atoms of the interfacial residues relative to the starting structure in the three systems; LongAB, LatB and LatA.

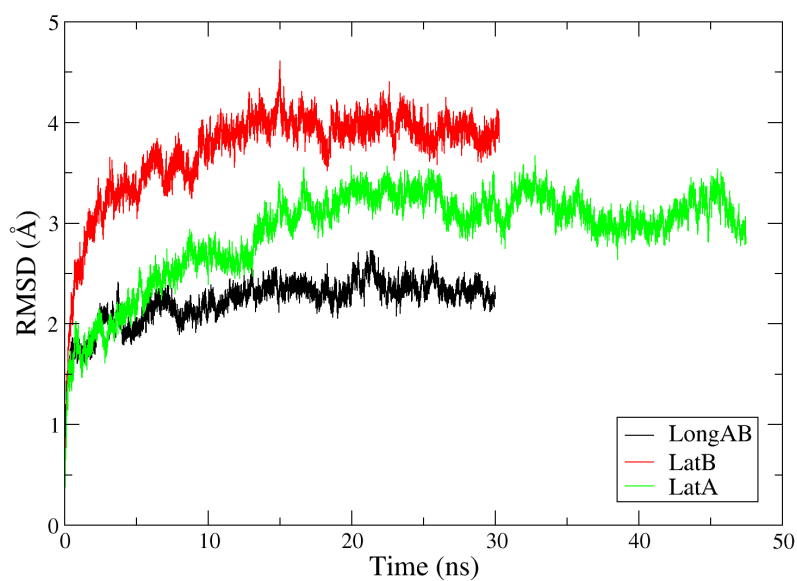

Figure S2: An all-atom model of the LongAB system with subunit assignment.

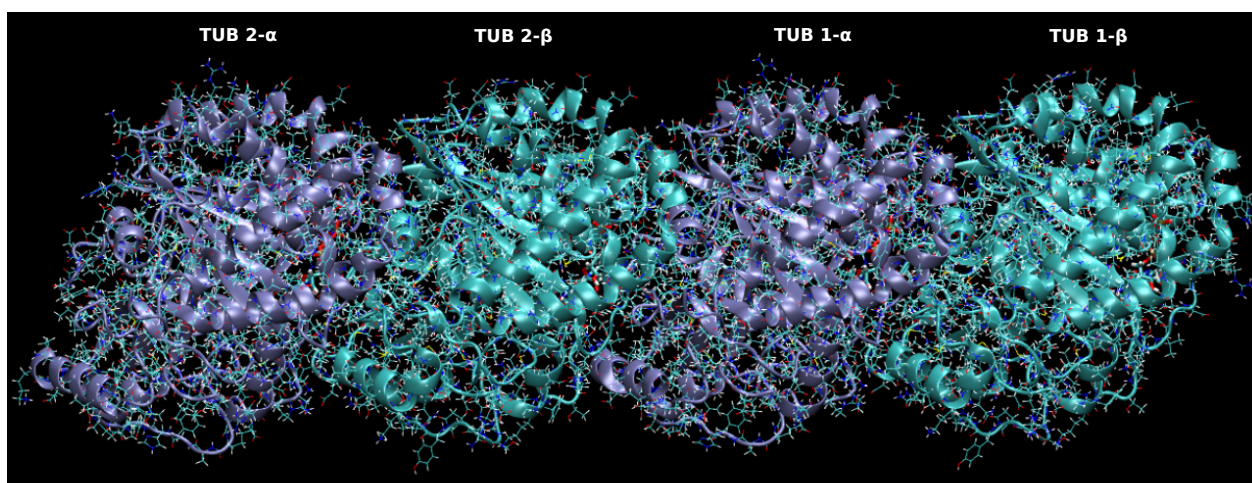

Table S1: Energy of hydrogen bonds in the LongAB interface in kJ/mol. SS# is snapshot number.

| TUB 1- $\alpha$     | TUB 2- $\beta$ | SS1   | SS2   | SS3   | SS4   | SS5   | SS6   | SS7   | SS8   | $E_{average}$ | SD |
|---------------------|----------------|-------|-------|-------|-------|-------|-------|-------|-------|---------------|----|
| Arg2                | Glu71          | -62.5 | -33.4 | -42.6 | -42.3 | -38.3 | -20.1 | -58.7 | -23.2 | -40.1         | 15 |
| Glu434              | Arg401         | -30.0 | -17.5 | -39.3 | -59.0 | -32.4 | -44.3 | -38.1 | 0.0   | -32.6         | 18 |
| Tyr262              | Arg401         | -46.7 | -45.0 | -32.7 | -45.5 | 0.0   | -13.3 | -25.6 | -47.6 | -32.0         | 18 |
| Arg243              | Asp76          | -37.3 | -17.3 | -39.4 | -35.7 | 0.0   | -24.4 | -42.8 | -42.1 | -29.9         | 15 |
| Thr349              | Val181         | -44.6 | -34.6 | -13.8 | -14.3 | -43.6 | -21.5 | -21.0 | -13.0 | -25.8         | 13 |
| Asp438              | Arg401         | -26.3 | -55.1 | -57.1 | 0.0   | 0.0   | 0.0   | 0.0   | -52.7 | -23.9         | 27 |
| Val260              | His406         | -31.7 | -34.1 | -12.9 | -8.8  | -12.1 | -41.6 | -15.5 | -20.0 | -22.1         | 12 |
| Gln133              | Gly98          | -16.8 | -39.1 | -20.7 | -22.8 | -21.2 | -28.2 | -10.7 | -16.0 | -21.9         | 9  |
| Thr257              | Gly100         | -22.7 | -35.5 | -17.6 | -27.2 | -16.3 | -13.2 | -14.3 | -24.2 | -21.4         | 8  |
| Lys352              | Thr180         | -18.5 | -16.8 | -22.1 | 0.0   | -30.4 | -16.3 | -32.1 | -12.9 | -18.7         | 10 |
| Asn249              | Gln11          | -22.6 | -20.8 | -27.5 | -23.1 | 0.0   | -28.6 | 0.0   | -26.3 | -18.6         | 12 |
| Asn329              | Lys176         | -26.4 | -18.2 | -26.1 | -19.4 | -24.4 | 0.0   | 0.0   | -7.6  | -15.3         | 11 |
| Lys163              | Glu411         | -34.2 | 0.0   | -40.1 | 0.0   | 0.0   | -43.7 | 0.0   | 0.0   | -14.8         | 21 |
| Asn258              | Val181         | 0.0   | -14.8 | -15.6 | -29.7 | -8.8  | -9.4  | -22.4 | -10.2 | -13.9         | 9  |
| Lys352              | Asp179         | 0.0   | 0.0   | 0.0   | -20.0 | -12.2 | -33.7 | -12.9 | 0.0   | -9.9          | 12 |
| Asn249              | Glu71          | 0.0   | 0.0   | -31.3 | 0.0   | 0.0   | -22.8 | 0.0   | 0.0   | -6.8          | 13 |
| Asp345              | Arg400         | 0.0   | 0.0   | 0.0   | 0.0   | 0.0   | -28.0 | -23.6 | 0.0   | -6.4          | 12 |
| Asn258              | Asn101         | 0.0   | -20.6 | 0.0   | 0.0   | -14.3 | 0.0   | -12.9 | 0.0   | -6.0          | 9  |
| Arg2                | Gln96          | -3.5  | 0.0   | 0.0   | -15.2 | 0.0   | 0.0   | 0.0   | -23.8 | -5.3          | 9  |
| Val260              | Trp407         | 0.0   | -9.5  | 0.0   | -4.3  | -17.7 | -6.7  | 0.0   | 0.0   | -4.8          | 6  |
| Gln133              | Ser97          | 0.0   | 0.0   | -4.7  | 0.0   | 0.0   | 0.0   | 0.0   | -30.4 | -4.4          | 11 |
| Leu132              | Gln96          | 0.0   | 0.0   | 0.0   | 0.0   | 0.0   | -18.5 | -14.8 | 0.0   | -4.2          | 8  |
| Asn258              | Val182         | 0.0   | -13.8 | -13.5 | 0.0   | 0.0   | 0.0   | 0.0   | 0.0   | -3.4          | 6  |
| Lys326              | Tyr210         | 0.0   | 0.0   | 0.0   | 0.0   | 0.0   | -17.9 | 0.0   | 0.0   | -2.2          | 6  |
| Thr130              | Gln96          | 0     | 0     | 0     | 0     | -17   | 0     | 0     | 0     | -2.1          | 6  |
| Asn258              | Thr180         | 0.0   | 0.0   | 0.0   | -16.1 | 0.0   | 0.0   | 0.0   | 0.0   | -2.0          | 6  |
| Val437              | Arg401         | 0.0   | 0.0   | 0.0   | 0.0   | 0.0   | -11.6 | 0.0   | 0.0   | -1.4          | 4  |
| Val353              | Asp179         | 0.0   | -5.0  | -4.4  | 0.0   | 0.0   | 0.0   | 0.0   | 0.0   | -1.2          | 2  |
| Lys336              | Lys176         | 0.0   | 0.0   | -2.3  | 0.0   | 0.0   | 0.0   | 0.0   | -4.2  | -0.8          | 2  |
| Glu254              | Asn101         | 0.0   | 0.0   | 0.0   | 0.0   | 0.0   | 0.0   | -3.5  | 0.0   | -0.4          | 1  |
| <b>Total Energy</b> |                | -424  | -431  | -464  | -384  | -289  | -444  | -349  | -354  | -392          | 59 |

Figure S3: An all-atom model of the LatB system with subunit assignment.

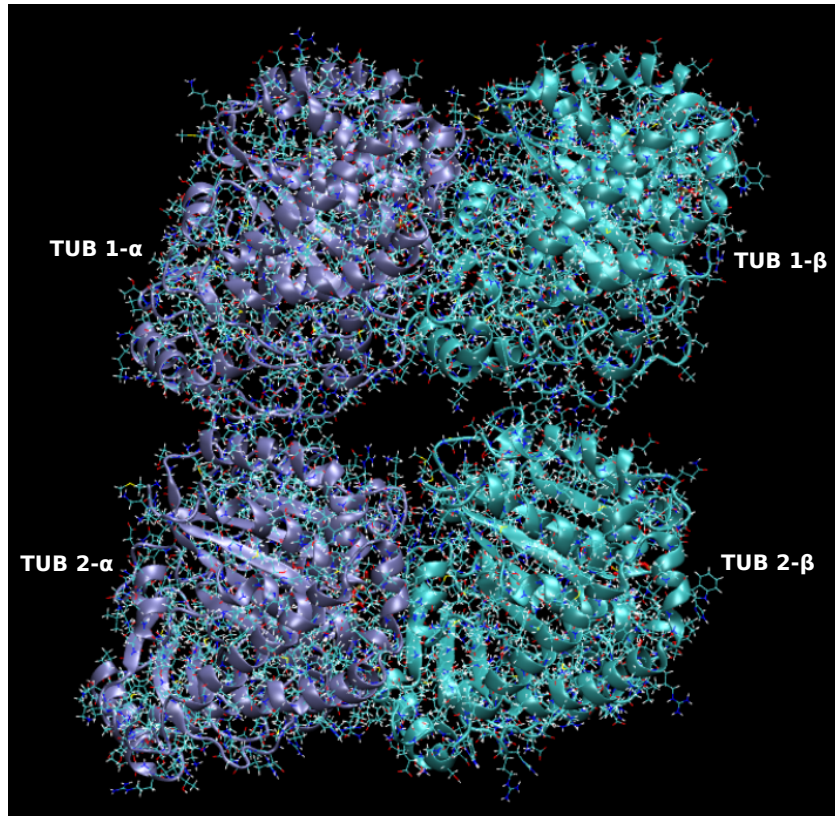

Figure S4: An all-atom model of the LatA system with subunit assignment.

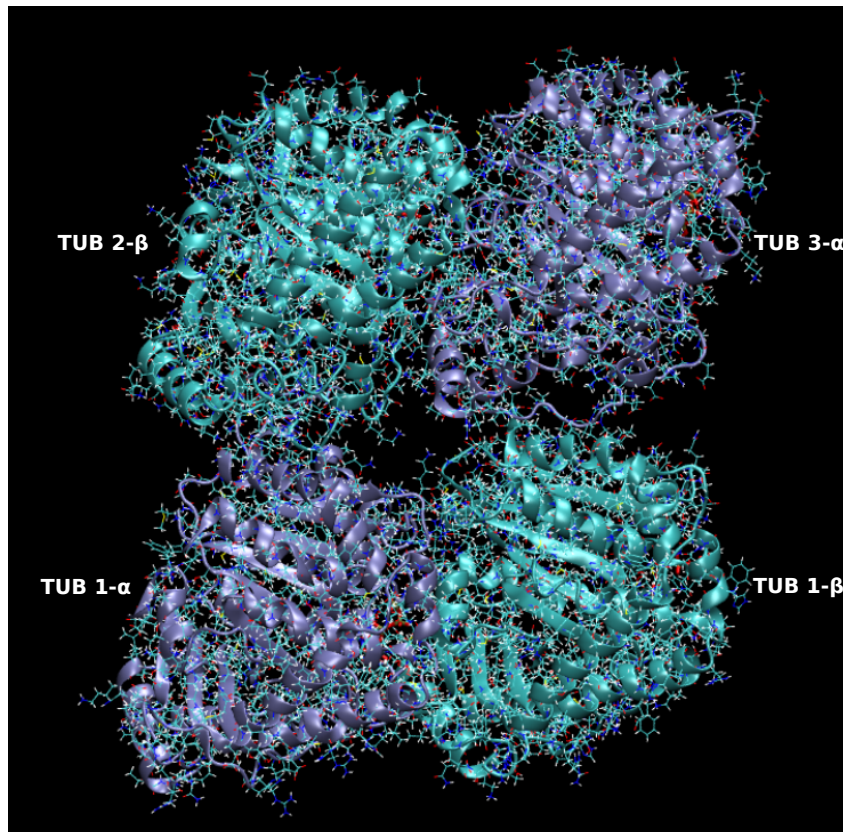

Table S2: Energy of hydrogen bonds in the LatB interface in kJ/mol. SS# is snapshot number.

| $\alpha$ - $\alpha$ Interactions |                 |       |       |       |       |       |       |       |       |               |    |
|----------------------------------|-----------------|-------|-------|-------|-------|-------|-------|-------|-------|---------------|----|
| TUB 1- $\alpha$                  | TUB 2- $\alpha$ | SS1   | SS2   | SS3   | SS4   | SS5   | SS6   | SS7   | SS8   | $E_{average}$ | SD |
| Arg215                           | Glu90           | 0.0   | -44.0 | -36.7 | -49.3 | -64.7 | -51.4 | -40.6 | -55.3 | -42.7         | 19 |
| Lys338                           | Asp127          | -24.5 | -13.8 | -33.6 | -34.1 | -26.2 | -41.9 | -28.9 | -24.7 | -28.5         | 8  |
| Glu297                           | Arg121          | -26.1 | -21.9 | -40.0 | 0.0   | -62.8 | 0.0   | -23.6 | -22.2 | -24.6         | 20 |
| Glu297                           | Lys124          | -20.0 | -29.2 | -15.9 | -38.3 | 0.0   | -32.1 | -35.8 | -17.1 | -23.5         | 13 |
| Glu284                           | Ser54           | 0.0   | -32.6 | -24.3 | 0.0   | -33.4 | -24.5 | -38.7 | -24.8 | -22.3         | 15 |
| Gln372                           | Glu55           | -28.0 | 0.0   | -13.7 | -28.0 | -15.9 | -20.9 | -16.9 | -24.2 | -18.4         | 9  |
| Tyr282                           | Ser48           | 0.0   | -31.8 | -19.3 | -20.9 | -8.1  | 0.0   | 0.0   | -13.2 | -11.7         | 12 |
| His283                           | Phe49           | -7.5  | -8.8  | -28.2 | 0.0   | -12.8 | -5.8  | -7.9  | -13.5 | -10.5         | 8  |
| Ala278                           | Asn50           | -20.3 | 0.0   | 0.0   | -10.0 | -14.9 | 0.0   | 0.0   | 0.0   | -5.7          | 8  |
| Arg373                           | Ser54           | -8.1  | 0.0   | -25.4 | 0.0   | 0.0   | 0.0   | 0.0   | 0.0   | -4.2          | 9  |
| Glu284                           | Lys60           | 0.0   | 0.0   | 0.0   | 0.0   | 0.0   | -8.5  | -23.6 | 0.0   | -4.0          | 8  |
| Leu286                           | Ser54           | 0.0   | -2.9  | -7.6  | 0.0   | -9.3  | -4.7  | 0.0   | -6.1  | -3.8          | 4  |
| Gln285                           | Gly57           | -15.1 | 0.0   | 0.0   | 0.0   | 0.0   | 0.0   | -11.9 | 0.0   | -3.4          | 6  |
| Gln372                           | Thr56           | 0.0   | 0.0   | 0.0   | 0.0   | 0.0   | -24.6 | 0.0   | 0.0   | -3.1          | 9  |
| His283                           | Asn50           | 0.0   | -11.3 | 0.0   | 0.0   | 0.0   | 0.0   | 0.0   | 0.0   | -1.4          | 4  |
| Glu290                           | Gln128          | 0     | 0     | 0     | 0     | -9    | 0     | 0     | 0     | -1.1          | 3  |
| Lys370                           | Thr51           | 0.0   | 0.0   | 0.0   | 0.0   | 0.0   | 0.0   | -7.1  | 0.0   | -0.9          | 3  |
| <b>Total Subunit Energy</b>      |                 | -149  | -196  | -245  | -180  | -257  | -214  | -235  | -201  | -210          | 35 |
| $\beta$ - $\beta$ Interactions   |                 |       |       |       |       |       |       |       |       |               |    |
| TUB 1- $\beta$                   | TUB 2- $\beta$  | SS1   | SS2   | SS3   | SS4   | SS5   | SS6   | SS7   | SS8   | $E_{average}$ | SD |
| Arg308                           | Asp116          | -46.7 | -58.9 | 0.0   | -37.5 | -69.8 | -57.4 | -54.3 | -33.7 | -44.8         | 22 |
| Glu290                           | Arg88           | -51.6 | -35.3 | -32.2 | -55.4 | -22.6 | -30.3 | -30.3 | -53.9 | -38.9         | 13 |
| Arg308                           | Asp120          | -29.2 | -26.9 | -27.3 | -25.6 | -37.7 | -27.6 | -61.5 | -58.2 | -36.7         | 15 |
| Lys299                           | Asp90           | -11.0 | -37.8 | -25.5 | -34.6 | -31.0 | -34.7 | -31.3 | -55.0 | -32.6         | 12 |
| Asp297                           | Lys124          | -31.8 | 0.0   | -31.3 | 0.0   | -32.1 | 0.0   | -29.0 | -54.4 | -22.3         | 20 |
| Tyr342                           | Asp120          | 0.0   | -9.9  | 0.0   | -10.8 | -25.1 | -8.1  | -41.7 | -51.8 | -18.4         | 19 |
| Ser280                           | Arg88           | -14.5 | -21.7 | -6.3  | -22.9 | 0.0   | -51.6 | 0.0   | -16.1 | -16.6         | 17 |
| Lys338                           | Lys124          | -6.4  | -20.8 | -15.5 | -24.9 | -25.2 | 0.0   | 0.0   | -25.4 | -14.8         | 11 |
| Lys338                           | Ser126          | -24.0 | -23.6 | -7.2  | 0.0   | -14.0 | 0.0   | 0.0   | -27.5 | -12.0         | 12 |
| Lys338                           | Arg123          | 0.0   | 0.0   | 0.0   | 0.0   | 0.0   | -35.9 | -19.9 | -4.1  | -7.5          | 13 |
| Asn334                           | Glu127          | 0.0   | -19.0 | 0.0   | -32.7 | 0.0   | 0.0   | 0.0   | 0.0   | -6.5          | 12 |
| Asn335                           | Glu128          | 0.0   | -6.8  | 0.0   | 0.0   | 0.0   | 0.0   | 0.0   | 0.0   | -0.9          | 2  |
| <b>Total Subunit Energy</b>      |                 | -215  | -261  | -145  | -244  | -257  | -246  | -268  | -380  | -252          | 65 |
| <b>Total Energy</b>              |                 | -365  | -457  | -390  | -425  | -514  | -460  | -503  | -581  | -462          | 70 |

Table S3: Energy of hydrogen bonds in the LatA interface in kJ/mol. SS# is snapshot number.

| $\alpha$ - $\beta$ Interactions |                 |       |       |       |       |       |       |       |       |               |      |
|---------------------------------|-----------------|-------|-------|-------|-------|-------|-------|-------|-------|---------------|------|
| TUB 1- $\alpha$                 | TUB 2- $\beta$  | SS1   | SS2   | SS3   | SS4   | SS5   | SS6   | SS7   | SS8   | $E_{average}$ | SD   |
| Asp47                           | Arg284          | -44.6 | -17.9 | -41.5 | -40.4 | -32.1 | -54.1 | -71.1 | -36.0 | -42.2         | 15.7 |
| Lys124                          | Asp297          | -24.7 | -19.4 | -39.2 | -42.9 | -29.9 | -25.5 | -27.4 | -44.8 | -31.7         | 9.4  |
| Gln85                           | Ser280          | -31.4 | -23.8 | 0.0   | -29.4 | -34.9 | -23.1 | -22.4 | -23.4 | -23.6         | 10.6 |
| Asp46                           | Arg278          | -26.7 | -10.3 | -39.2 | -39.6 | -14.3 | -19.8 | -33.9 | 0.0   | -23.0         | 14.4 |
| Asp127                          | Asn334          | -25.0 | -24.3 | -27.9 | -16.4 | -21.9 | -21.8 | -28.5 | -15.0 | -22.6         | 4.9  |
| Asp120                          | Lys338          | -39.2 | 0.0   | -20.4 | -36.6 | -26.5 | 0.0   | -25.3 | -31.4 | -22.4         | 15.1 |
| Gln128                          | Gln293          | -6.5  | -20.3 | -27.8 | -36.5 | -10.6 | -28.8 | -18.1 | 0.0   | -18.6         | 12.3 |
| Asp47                           | Gln282          | -32.0 | -8.2  | -17.8 | 0.0   | -29.7 | 0.0   | -8.6  | -36.0 | -16.5         | 14.5 |
| Glu55                           | Arg284          | -39.8 | 0.0   | -45.9 | 0.0   | 0.0   | -19.8 | -13.0 | 0.0   | -14.8         | 18.9 |
| Arg121                          | Asp297          | 0.0   | -69.3 | 0.0   | 0.0   | -35.3 | 0.0   | 0.0   | 0.0   | -13.1         | 25.9 |
| Asp47                           | Arg278          | 0.0   | -18.5 | 0.0   | 0.0   | 0.0   | -34.0 | -16.8 | -25.5 | -11.9         | 13.7 |
| Ser54                           | Lys372          | 0.0   | 0.0   | 0.0   | 0.0   | -21.1 | -18.6 | -13.5 | -24.3 | -9.7          | 10.8 |
| Lys124                          | Gln293          | 0.0   | -12.8 | -17.0 | 0.0   | -15.6 | 0.0   | 0.0   | -9.9  | -6.9          | 7.7  |
| His88                           | Gln281          | 0.0   | -9.3  | -19.8 | -16.2 | 0.0   | 0.0   | 0.0   | 0.0   | -5.7          | 8.3  |
| Ser54                           | Arg284          | -11.1 | 0.0   | 0.0   | 0.0   | -32.0 | 0.0   | 0.0   | 0.0   | -5.4          | 11.4 |
| Arg123                          | Asn334          | 0.0   | -15.8 | 0.0   | -5.3  | 0.0   | -1.9  | -16.1 | 0.0   | -4.9          | 7.1  |
| Thr56                           | Gly370          | -7.7  | -16.7 | -4.4  | -7.5  | 0.0   | 0.0   | 0.0   | 0.0   | -4.5          | 6.0  |
| Gly59                           | Arg284          | 0.0   | 0.0   | -19.2 | -16.3 | 0.0   | 0.0   | 0.0   | 0.0   | -4.4          | 8.2  |
| Phe53                           | Ser374          | 0.0   | 0.0   | 0.0   | 0.0   | 0.0   | 0.0   | 0.0   | -31.1 | -3.9          | 11.0 |
| Asn50                           | Gln282          | 0.0   | 0.0   | 0.0   | -9.6  | 0.0   | -20.4 | 0.0   | 0.0   | -3.8          | 7.5  |
| Phe87                           | Ser280          | 0.0   | 0.0   | -24.5 | 0.0   | 0.0   | 0.0   | 0.0   | 0.0   | -3.1          | 8.7  |
| Gln128                          | Thr287          | 0.0   | 0.0   | 0.0   | 0.0   | 0.0   | 0.0   | 0.0   | -18.8 | -2.4          | 6.7  |
| Ser54                           | Met373          | 0.0   | 0.0   | 0.0   | 0.0   | 0.0   | -15.1 | 0.0   | 0.0   | -1.9          | 5.3  |
| Gln128                          | Glu290          | 0.0   | 0.0   | 0.0   | 0.0   | 0.0   | 0.0   | 0.0   | -14.6 | -1.8          | 5.2  |
| <b>Total Subunit Energy</b>     |                 | -289  | -267  | -344  | -297  | -304  | -283  | -295  | -311  | -299          | 23   |
| $\beta$ - $\alpha$ Interactions |                 |       |       |       |       |       |       |       |       |               |      |
| TUB 1- $\beta$                  | TUB 3- $\alpha$ | SS1   | SS2   | SS3   | SS4   | SS5   | SS6   | SS7   | SS8   | $E_{average}$ | SD   |
| Arg88                           | Glu279          | -45.6 | -26.5 | -36.3 | -47.6 | -40.4 | -40.1 | -45.3 | 0.0   | -35.2         | 15.7 |
| Lys124                          | Glu284          | -25.6 | 0.0   | -36.6 | -32.4 | -30.2 | -38.7 | -35.2 | -17.2 | -27.0         | 12.9 |
| Ile86                           | Tyr282          | -7.5  | -29.9 | 0.0   | -31.9 | -38.9 | -23.1 | -25.2 | -27.1 | -22.9         | 12.9 |
| Asp90                           | Lys280          | -36.6 | 0.0   | -27.4 | -19.7 | -39.1 | -25.8 | 0.0   | 0.0   | -18.6         | 16.5 |
| Asn54                           | Glu284          | -37.0 | 0.0   | -24.6 | 0.0   | 0.0   | -19.8 | -14.5 | -19.5 | -14.4         | 13.6 |
| Glu127                          | Thr334          | 0.0   | -34.3 | 0.0   | -33.4 | -43.0 | 0.0   | 0.0   | 0.0   | -13.8         | 19.3 |
| Asp90                           | Ala281          | -17.4 | -14.8 | 0.0   | 0.0   | -22.6 | -17.9 | -30.9 | 0.0   | -12.9         | 11.7 |
| Glu127                          | Thr337          | 0.0   | -22.9 | 0.0   | -39.0 | 0.0   | 0.0   | 0.0   | -20.4 | -10.3         | 15.2 |
| Glu55                           | Gln285          | -5.4  | -13.1 | -11.9 | -9.3  | -6.7  | -20.2 | -9.1  | 0.0   | -9.5          | 6.0  |
| Thr33                           | His283          | 0.0   | 0.0   | -18.3 | -5.2  | 0.0   | 0.0   | 0.0   | -11.6 | -4.4          | 7.0  |
| Asp120                          | Lys338          | -18.4 | 0.0   | 0.0   | 0.0   | 0.0   | 0.0   | 0.0   | 0.0   | -2.3          | 6.5  |
| Arg88                           | Ala281          | 0.0   | 0.0   | 0.0   | -8.4  | 0.0   | -5.0  | 0.0   | 0.0   | -1.7          | 3.2  |
| <b>Total Subunit Energy</b>     |                 | -193  | -141  | -155  | -227  | -221  | -191  | -160  | -96   | -173          | 44   |
| <b>Total Energy</b>             |                 | -482  | -408  | -499  | -523  | -525  | -474  | -455  | -406  | -472          | 46   |
